# Supplementary material for: Exposure to perfluoroalkyl substances and risk of hepatocellular carcinoma in a multiethnic cohort
Source: PubMed Central journal article supplement — JHEP Rep. 2022 Aug 8;4(10):100550. doi: 10.1016/j.jhepr.2022.100550 (PMC9468464; doi:10.1016/j.jhepr.2022.100550), 2022-08-08
Supplement: mmc1.pdf [file mmc1.pdf]

# Exposure to perfluoroalkyl substances and risk of hepatocellular carcinoma in a multiethnic cohort

Jesse A. Goodrich, Douglas Walker, Xiangping Lin, Hongxu Wang, Tiffany Lim, Rob McConnell, David V. Conti, Lida Chatzi, Veronica Wendy Setiawan

## Table of contents

|               |   |
|---------------|---|
| Fig. S1.....  | 2 |
| Table S1..... | 3 |
| Table S2..... | 4 |
| Table S3..... | 5 |
| Table S4..... | 6 |

**Fig. S1.** Correlation between plasma PFAS concentrations at baseline in 50 HCC cases and 50 controls matched on age, sex, ethnicity, and study area from the Multiethnic Cohort.

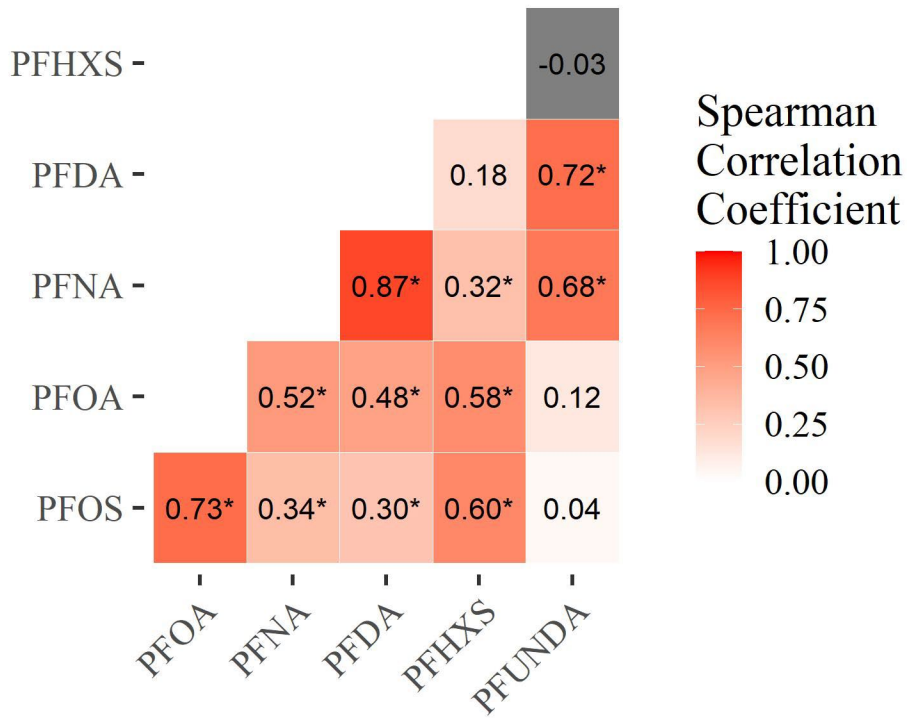

**Table S1.** Results of sensitivity analysis modeling PFAS as continuous exposures. Odds ratios and 95% confidence intervals for each standard deviation increase in prediagnostic serum concentrations of PFAS and risk of hepatocellular carcinoma in the Multiethnic Cohort.

| <b>Chemical Category</b> | <b>PFAS</b> | <b>Odds Ratio (95% CI)</b> | <b>p-value</b> |
|--------------------------|-------------|----------------------------|----------------|
| PFSA's                   | PFOS        | 1.20 (0.91, 1.60)          | 0.18           |
|                          | PFHxS       | 1.10 (0.89, 1.50)          | 0.29           |
| PFCA's                   | PFOA        | 0.86 (0.64, 1.20)          | 0.36           |
|                          | PFDA        | 0.95 (0.66, 1.40)          | 0.76           |
|                          | PFNA        | 1.10 (0.81, 1.50)          | 0.51           |
|                          | PFUdA       | *                          | *              |

**Table S2.** Results of sensitivity analysis using ordinary logistic regression and controlling for the matching variables (age, sex, ethnicity, and study site). Odds ratios and 95% confidence intervals evaluating prediagnostic serum concentrations of PFAS levels and risk of hepatocellular carcinoma in the Multiethnic Cohort.

| <b>Chemical Category</b> | <b>PFAS</b> | <b>µg/L</b> | <b>Odds Ratio (95% CI)</b> | <b>p-value</b> |
|--------------------------|-------------|-------------|----------------------------|----------------|
| PFSA's                   | PFOS        | >54.9       | 4.40 (1.20, 20.00)         | 0.03           |
|                          | PFHxS       | >4.3        | 1.20 (0.38, 3.70)          | 0.77           |
| PFCA's                   | PFOA        | >8.6        | 1.20 (0.37, 3.80)          | 0.78           |
|                          | PFDA        | >0.8        | 0.85 (0.25, 2.80)          | 0.79           |
|                          | PFNA        | >1.5        | 1.20 (0.35, 4.10)          | 0.79           |
|                          | PFUdA       | >1.2        | 2.60 (0.77, 9.70)          | 0.14           |

**Table S3.** Results of a supplemental analysis adjusting for baseline Body Mass Index (BMI). Odds ratios and 95% confidence intervals evaluating prediagnostic serum concentrations of PFAS levels and risk of hepatocellular carcinoma in the Multiethnic Cohort.

| <b>Chemical Category</b> | <b>PFAS</b> | <b>µg/L</b> | <b>Odds Ratio (95% CI)</b> | <b>p-value</b> |
|--------------------------|-------------|-------------|----------------------------|----------------|
| PFSA's                   | PFOS        | >54.9       | 2.90 (0.78, 10.00)         | 0.11           |
|                          | PFHxS       | >4.3        | 1.10 (0.44, 2.60)          | 0.89           |
| PFCA's                   | PFOA        | >8.6        | 0.86 (0.34, 2.20)          | 0.75           |
|                          | PFDA        | >0.8        | 1.00 (0.42, 2.40)          | 0.99           |
|                          | PFNA        | >1.5        | 1.50 (0.64, 3.50)          | 0.35           |
|                          | PFUdA       | >1.2        | 2.70 (0.92, 7.80)          | 0.069          |

**Table S4.** Results of the sensitivity analysis adjusting for baseline Diabetes Mellitus Status. Odds ratios and 95% confidence intervals evaluating prediagnostic serum concentrations of PFAS levels and risk of hepatocellular carcinoma in the Multiethnic Cohort.

| <b>Chemical Category</b> | <b>PFAS</b> | <b>µg/L</b> | <b>Odds Ratio (95% CI)</b> | <b>p-value</b> |
|--------------------------|-------------|-------------|----------------------------|----------------|
| PFSA's                   | PFOS        | >54.9       | 5.70 (1.10, 30.00)         | 0.042          |
|                          | PFHxS       | >4.3        | 1.60 (0.63, 4.00)          | 0.32           |
| PFCA's                   | PFOA        | >8.6        | 1.40 (0.60, 3.40)          | 0.43           |
|                          | PFDA        | >0.8        | 0.54 (0.19, 1.50)          | 0.24           |
|                          | PFNA        | >1.5        | 1.40 (0.50, 3.70)          | 0.54           |
|                          | PFUdA       | >1.2        | 2.50 (0.74, 8.30)          | 0.14           |
